# Supplementary material for: Impact of enzymatic digestion on bacterial community composition in CF airway samples
Source: PubMed Central journal article supplement (PMC5452939; doi:10.7717/peerj.3362), 2017-05-30
Supplement: peerj-05-3362-s002.pdf [file peerj-05-3362-s002.pdf]

```

#Load Libraries
library("vegan")
library(exactRankTests)
library(ggplot2)
library(reshape2)
library("Matrix")
library("diagonals")
library(schoolmath)
library(RGraphics)
library(gridExtra)
library("grid")
library("xtable")

#Read in Data
mypath<-"C:/Users/wkayla/Desktop/Microbiome/Enzyme Digest/Data/EnzymeDigest_Workspace_1_OTU.txt"
data=read.table(mypath, header = T, sep="\t",na.strings= "na")

#Code for Functions Used throught out this program
#format Data From Explicit for use in R
otu_from_explicit=function(data){
  colnames=data[,1]
  Id=colnames(data)[-1]
  data=t(data)
  colnames(data)=colnames
  data=data[-1,]
  data=apply(data,2,as.character),2,as.numeric)
  data=cbind.data.frame(Id,data)
  rownames(data)=seq(nrow(data))
  return(data)}

#Used for splitting taxa names
name.split<-function(names){
  names=names
  save=strsplit(names,"/")

  h=0
  for(i in 1:length(names)){
    h[i]=length(save[[i]])}

  i=0
  name.list=NULL
  for(i in 1:length(save)){
    name.list[i]=save[[i]][h[i]]}
  return(name.list)
}

#Creates a block diagonal matrix
rblock<- function(nb) {
  .bdiag(replicate(nb, {
    Matrix(c(0,1,1,0), 2,2) )))
}

#Format and Clean Data

#Transform data into nXp otu table
otu=otu_from_explicit(data)

#save Pseudmonas and Pseudmonasdales
pseudmonasdales=otu$'Bacteria/Proteobacteria/Gammaproteobacteria/Pseudomonadales'
pseudmonas=otu$'Bacteria/Proteobacteria/Gammaproteobacteria/Pseudomonadales/Pseudomonadaceae/Pseudomonas'

#Combine Pseudmonas and Pseudmonasdales into PseudomansPlus
PseudomonasPlus=pseudmonasdales+pseudmonas
otu$PseudomonasPlus=PseudomonasPlus

#Delete psedumonas and pseudomonasdales out of OTU
otu=otu[,-which(colnames(otu)=='Bacteria/Proteobacteria/Gammaproteobacteria/Pseudomonadales/Pseudomonadaceae/Pseudomonas' )]

otu=otu[,-which(colnames(otu)=='Bacteria/Proteobacteria/Gammaproteobacteria/Pseudomonadales')]

#Create a dataframe of Relative Abundances
rel.otu=otu[,3:255]/otu[,2]

#create a data frame for use in Wilcox Exact Signed Rank Tests
##Delete out the Unclassified Taxa as well as Taxa whose lowest classification is Bacteria
wilx.otu=otu[,2:255]

#adjust the root
wilx.otu$root=wilx.otu$root-wilx.otu$Unclassified
wilx.otu$root=wilx.otu$root-wilx.otu$Bacteria

#delete Unclassified
un.row=which(colnames(wilx.otu)=='Unclassified' )
wilx.otu=wilx.otu[,-un.row]

#delete bacteria
bac.row=which(colnames(wilx.otu)=='Bacteria' )
wilx.otu=wilx.otu[,-49]

#Recalculate Relative Abundance
wilx.rel.otu=wilx.otu[,2:252]/wilx.otu[,1]

#Create a Factor Variable for Digest; those ending in B have been digested all else were undigested
digest=factor(rep(0:1,81),levels=c(0,1),labels=c("Without EnzD","With EnzD"))

#Do the same for location of sample; those with C in the
#original data are OP samples those beginning with E are sputum samples

```

```

area=factor(c(rep(0,84),rep(1,78)),levels=c(0,1),labels=c("OP","Sputum"))

#Subset Data based on location of samples
OP.otu=otu[1:84,]
Sputum.otu=otu[85:162,]

rel.OP.otu=rel.otu[1:84,]
rel.Sputum.otu=rel.otu[85:162,]

#rows that are(not) of EnzD samples
digest_rows=seq(0,162,2)
nondigest_rows=seq(1,162,2)

##### Alpha Diversity #####

#Shannon Alpha Diversity
div=diversity(rel.otu,index ="shannon")
boxplot(div~digest, data =otu, main ="Shannon Diversity Digest Versus Non")
wilcox.exact(div~digest, paired=T)

#Species Richness vs. Diversity
#Begin with Shannon-H diversity
H=diversity(rel.otu,index ="shannon")
## Species richness (S) and Pielou's evenness (J): From Vegan documentation
S <- specnumber(rel.otu)
J <- H/log(S)

#OP Only Shannon Diversity
boxplot(div[1:84]~digest[1:84], data =otu, main ="Shannon Diversity Digest Versus Non--OP")
wilcox.exact(div[1:84]~digest[1:84], paired=T)

#OP Only richness
boxplot(S[1:84]~digest[1:84], data =otu, main ="Richness Digest Versus Non--OP")
wilcox.exact(S[1:84]~digest[1:84], paired=T)

#OP Only Peilou's evenness
boxplot(J[1:84]~digest[1:84], data =otu, main ="Evenness Digest Versus Non--OP")
wilcox.exact(J[1:84]~digest[1:84], paired=T)

#Sputum Only Shannon Diversity
boxplot(div[85:162]~digest[85:162], data =otu, main ="Shannon Diversity Digest Versus Non--Sputum")
wilcox.exact(div[85:162]~digest[85:162], paired=T)

#Sputum Only richness
boxplot(S[85:162]~digest[85:162], data =otu, main ="Richness Digest Versus Non--Sputum")
wilcox.exact(S[85:162]~digest[85:162], paired=T)

#Sputum Only Peilou's evenness
boxplot(J[85:162]~digest[85:162], data =otu, main ="Peilou's Evenness Digest Versus Non--Sputum")
wilcox.exact(J[85:162]~digest[85:162], paired=T)

#Extract only those relative abundances whose median is at least 1% for OP samples
medt=round(apply(rel.OP.otu,2,median),2)
medt=medt[medt >=.01]
pcoa.OP.otu=OP.otu[,names(medt)]

##### Beta Diversity #####

#PCoA for OP samples only
dist=vegdist(pcoa.OP.otu,method="morisita")
pcoa=cmdscale(dist)

#Create a name list for Graphical use
names=as.character(colnames(pcoa.OP.otu))
name.list=name.split(names)

#Create a data frame of variables from PCoA
vars=pcoa.OP.otu
colnames(vars)=name.list

#add on the PCoA scores to the OP otu dataset
ds=cbind(pcoa.OP.otu,pcoa)
colnames(ds)[15:16]=c("m1","m2")

#create vectors for those relative abundances whose pvalues are less than .005 for correaltion
vec.sp<-envfit(pcoa, vars)
vec.sp.df<-as.data.frame(cbind(vec.sp$vectors$arrows*sqrt(vec.sp$vectors$r),vec.sp$vectors$pvals))
vec.sp.df$species<-rownames(vec.sp.df)
colnames(vec.sp.df)<-c("Dim1","Dim2","Pvals","species")
vec.sp.df<-vec.sp.df[vec.sp.df$Pvals<.005,]

#create a biplot for OP samples
r=rep(1:42,each=2)
g2<-ggplot(ds,aes(x=ds$m1,y=ds$m2,group=r,color=digest[1:84]))+
  geom_line(col="black",linetype="dotted")+
  geom_point(size=3)+
  guides(col=F,size=F)+
  labs(x="Component 1",y="Component 2")+
  theme(text = element_text(size=20))+
  geom_segment(data=vec.sp.df,aes(x=0,xend=Dim1,y=0,yend=Dim2),
  arrow = arrow(length = unit(0.5, "cm")),
  colour="black",
  stat="identity",inherit.aes = FALSE) +
  geom_text(data=vec.sp.df,aes(x=Dim1,y=Dim2,label=species),
  inherit.aes = FALSE,
  size=5)+
  coord_fixed()+
  xlim(-1,1)+

```

```
ylim(-1,1)
```

```
#extract only those bacteria whose relative abundance is at least 1% for sputum samples  
meds=round(apply(rel.Sputum.otu,2,median),2)  
meds=meds[meds >=.01]  
pcoa.Sputum.otu=Sputum.otu[,names(meds)]
```

```
#Pcoa for Sputum  
dist=vegdist(pcoa.Sputum.otu,method="morisita")  
pcoa=cmdscale(dist)
```

```
#namelist from pcoa  
names=as.character(colnames(pcoa.Sputum.otu))  
name.list=name.split(names)
```

```
#Variables from PCOA  
vars=pcoa.Sputum.otu  
colnames(vars)=name.list
```

```
#Create Data set with Principal coordinates  
d=cbind(pcoa.Sputum.otu,pcoa)  
colnames(d)[8:9]=c("p1","p2")
```

```
#Define the three clusters  
d_C1=rownames(d[which(d$p2>-.25 & d$p1 < -.1),])  
d_C2=rownames(d[which(d$p2< -.03),])  
d_C3=rownames(d[which(d$p1>-.1 & d$p2>-.3),])
```

```
#Obtain Alpha diversity for the clusters  
div=cbind.data.frame(diversity(rel.otu,index="shannon"),digest)  
d_C1_div=div[d_C1,]  
d_C2_div=div[d_C2,]  
d_C3_div=div[d_C3,]  
all_C_div=cbind.data.frame(rbind(d_C1_div,d_C2_div,d_C3_div),c(rep(1,44),rep(2,4),rep(3,30)))  
colnames(all_C_div)=c("Index","Digest","Cluster")
```

```
#plot and test  
digest_alpha_clusters=all_C_div[all_C_div$Digest=="With EnzD",]  
nondigest_alpha_clusters=all_C_div[all_C_div$Digest=="Without EnzD",]  
  
kruskal.test(digest_alpha_clusters$Index~digest_alpha_clusters$Cluster)  
  
par(mfrow=c(1,2))  
boxplot(digest_alpha_clusters$Index~digest_alpha_clusters$Cluster)  
boxplot(nondigest_alpha_clusters$Index~nondigest_alpha_clusters$Cluster)
```

```
# extract vectors whose pvalues are less than .005  
vec.sp<-envfit(pcoa, vars)  
vec.sp.df<-as.data.frame(cbind(vec.sp$vectors$arrows*sqrt(vec.sp$vectors$r),vec.sp$vectors$pvals))  
vec.sp.df$species<-rownames(vec.sp.df)  
colnames(vec.sp.df)<-c("Dim1","Dim2","Pvals","species")  
vec.sp.df<-vec.sp.df[vec.sp.df$Pvals<.005,]
```

```
#Pcoa plot for Sputum samples  
h=rep(1:39,each=2)  
g1<-ggplot(d,aes(x=d$p1,y=d$p2,group=h,color=digest[85:162]))+  
  geom_line(col="black", linetype="dotted")+  
  geom_point(size=3)+  
  guides(col=F,size=F)+  
  labs(x="Component 1", y="Component 2")+  
  theme(text=element_text(size=20))+  
  geom_segment(data=vec.sp.df,aes(x=0,xend=Dim1,y=0,yend=Dim2),  
              arrow=arrow(length=unit(0.5,"cm"),colour="grey",  
                           stat="identity",inherit.aes=FALSE)+  
  geom_text(data=vec.sp.df,aes(x=Dim1,y=Dim2,label=species),  
           inherit.aes=FALSE,size=5)+  
  coord_fixed()+  
  xlim(-1,1)+  
  ylim(-1,1)
```

```
#Place Sputum and OP PCOA in the same figure. This is figure 1  
grid.arrange(g2,g1,ncol=2,nrow=1,heights=c(2))
```

```
##### Genera Level Comparisons #####
```

```
#Wilcoxon Rank Sum Test --OP Only  
wilx.rel.OP.otu=wilx.rel.otu[1:84,]
```

```
#Subset based on which taxa have a median relative abundance of at least 1%  
median.wilx=wilx.rel.OP.otu[,names(medt)]
```

```
#Calculate absolute RA for OP swabs  
absolute.RA.OP.digest=list()  
absolute.RA.OP.non=list()  
for(i in 1:14){  
  absolute.RA.OP.digest[i]=unlist(tapply(median.wilx[,i],digest[1:84],median)[2])*100  
  absolute.RA.OP.non[i]=unlist(tapply(median.wilx[,i],digest[1:84],median)[1])*100  
}
```

```
#Calculate Wilcoxon Exact Signed Rank Tests for Each taxa  
wilx.op=apply(t(median.wilx),1,function(x) wilcox.exact(x[digest_rows],x[nondigest_rows],  
  paired=T,conf.int=T))
```

```
#round p-values to 2 digits  
wilx.estimate=round(unlist(lapply(wilx.op,function(x){return(x$estimate)})),4)*100  
table.p=round(p.adjust(unlist(lapply(wilx.op,function(x){if(x$p.value){return(x$p.value)}})),method="BH"),2)  
table.p=ifelse(table.p<=0.00,0.01,table.p)  
table.p.op=ifelse(table.p==0.01,paste("<",table.p,sep=""),table.p)
```

```
#Table One  
table.ra.op=cbind.data.frame(name.split(names(wilx.op)),  
  unlist(absolute.RA.OP.digest),
```

```

        unlist(absolute.RA.OP.non),
        wilx.estimate,table.p.op)

table.ra.op=table.ra.op[-13,]
#Name columns of Table 1
colnames(table.ra.op)=c("Genera",
                        "EnzD %",
                        "Non-EnzD %",
                        "Estimated Change in RA %",
                        "P-Value")

row.names(table.ra.op)<-seq(nrow(table.ra.op))

#Print Table 1
xtable(table.ra.op)

#Wilcoxon Rank Sum Test and Boxplots--Sputum Only
wilx.rel.Sputum.otu=wilx.rel.otu[85:162,]
median.wilx=wilx.rel.Sputum.otu[,names(meds)]

#Calculate absolute RA for sputum swabs
absolute.RA.sputum.digest=list()
absolute.RA.sputum.non=list()
for(i in 1:7){
  absolute.RA.sputum.digest[i]=tapply(median.wilx[,i],digest[85:162],median)[2]*100
  absolute.RA.sputum.non[i]=tapply(median.wilx[,i],digest[85:162],median)[1]*100
}

#Calculate Wilcoxon Exact Signed Rank Tests for Each taxa
wilx=apply(t(median.wilx),1,
           function(x) wilcox.exact(x[digest_rows],
                                   x[nondigest_rows],
                                   paired=T,conf.int = T))

#round p-values to 2 digits
wilx.estimate=round(unlist(lapply(wilx, function(x) {return(x$estimate)})),4)*100
table.p=round(p.adjust(unlist(lapply(wilx, function(x) {return(x$p.value)})),method="BH"),2)
table.p=ifelse(table.p<=0.00,0.01,table.p)
table.p.sputum=ifelse(table.p==0.01,paste("<",table.p,sep=""),table.p)

#Table One
table.ra.sputum=cbind.data.frame(name.split(names(wilx)),
                                unlist(absolute.RA.sputum.digest),
                                unlist(absolute.RA.sputum.non),
                                wilx.estimate,table.p.sputum)

#name columns in Table 1
colnames(table.ra.sputum)=c("Genera",
                            "EnzD %",
                            "Non-EnzD %",
                            "Estimated Change in RA %",
                            "P-Value")

row.names(table.ra.sputum)<-seq(nrow(table.ra.sputum))

#combine all significant bacterium for OP plus Staphylococcus (found in sputum)
#Need to be able to graph all significant taxa (OP and sputum) in one figure (Figure 3 in the paper)
significant.bacteria.genera=c(names(wilx.op)[-13],names(table.p.sputum)[2])
significant.bacteria.genera=as.character(significant.bacteria.genera)

#extract staph
staph=as.numeric(as.character(rel.OP.otu$`Bacteria/Firmicutes/Bacilli/Bacillales/Staphylococcaceae/Staphylococcus`))

#calculate p-value for staph in OP samples
staph.wilx=wilcox.exact(staph~digest[1:84],paired=T)

#combine with significant pvalues in OP samples
pvalues.bps=c(table.ra.op$`P-Value`,`0.01`)
names(pvalues.bps)<-c(names(pvalues.bps),"Bacteria/Firmicutes/Bacilli/Bacillales/Staphylococcaceae/Staphylococcus")

#extract sputum pvalues for those bacterium that were significant in OP samples
sputum.vals=rel.Sputum.otu[,significant.bacteria.genera]

#Calculate p-values for staph in sputum
i=0
hold=NULL
pvalues.sputum.bps=NULL
for(i in 1:length(significant.bacteria.genera)){
  hold=wilcox.exact(sputum.vals[,i]~digest[85:162],paired=T)
  pvalues.sputum.bps[i]=hold$p.value
}

#round pvalues and replaces 0s with 0.01
round.ps=round(p.adjust(pvalues.sputum.bps,method="BH"),2)
pvals=ifelse(round.ps==0,.01,round.ps)

#reformat and attach p for graphical use
pval=ifelse(pvals=="0.01",paste("p<",pvals, sep=""),paste("p=",pvals, sep=""))
v=ifelse(nchar(pval)==5,paste(pval,"0",sep=""),pval)

#Create a new dataset with the relative abundance of all significant taxa based on Wilcoxon Signed Rank Tests
bps=rel.otu[,significant.bacteria.genera]
name.list1=name.split(significant.bacteria.genera)

#Create new dataframes for digest versus nondigested samples
bps.digest=bps[digest_rows,]
bps.non=bps[nondigest_rows,]

#calculate differences in relative abundance
diff.bps=bps.digest-bps.non
diff.area=factor(c(rep("OP",42),rep("Sputum",39)),ordered=F)
diff.bps=cbind(diff.bps,diff.area)

```

```

colnames(diff.bps)=c(name.list1,"area")

#Create a long format dataset to in order to use facet_wrap in ggplot; area and digest remain as Id variables
plot.dat.genera=melt(diff.bps,idvars=area)

#Figure 3
B<-ggplot(data=plot.dat.genera)+
  geom_boxplot(aes(y = plot.dat.genera$value,x=plot.dat.genera$area))+
  coord_cartesian(ylim=c(-.30,.72))+
  xlab("")+
  ylab("Genera")+
  labs(fill="Group")+
  annotate("text", x = 1, y = .73, label = pvalues.bps,size = 5) +
  annotate("text", x = 2, y = .73, label = v, size = 5)+
  facet_wrap(~variable,ncol=5)+theme(text = element_text(size=25))

##### Morisita Horn Correlations #####

#RA versus MH for paired samples

dist=vegdist(otu[,3:255],method="morisita")
#Converts from Dissimilarity matrix to a similarity matrix
dist.mat=1-as.matrix(dist)

#Block diagonal matrix for OP samples
a<-rblock(81)
a=as.matrix(a)

#overlay diagonal matrix onto distance matrix
k=as.data.frame(dist.mat*a)
f=k[k!=0]

#Delete duplicate MH values; only need one per pair
mh=unique(f)

#compute the number of MH values above .8
m=as.data.frame(mh)
m$group=diff.area
sum=aggregate(m[,1]>.8, by=list(m$group),FUN=sum)
OP.percent=sum[[2]][1]/42
sputum.percent=sum[[2]][2]/39
OP.percent
sputum.percent

#Create a boxplot for Mh values grouped by sample location
p.value=wilcox.exact(m[,1]~m$group)$p.value

#p.value <0.001 so format
p.value= "p < 0.001"

#Figure 2
ggplot(data=m)+geom_boxplot(aes(y=mh, x = m$group),width=.42,fill = "white")+
  ylab("MH between Pairs")+xlab("")+
  geom_jitter(aes(y=mh, x = m$group),size=3,width = .055)+
  scale_x_discrete(breaks=unique(m$group),
                  labels=c("OP (n=42)", "Sputum (n=39)"))+
  theme_bw()+
  annotate("text", x = 1.17, y = 1, label =p.value ,size = 5) +
  theme(text = element_text(size=30),axis.line = element_line(colour = "black"),
        panel.grid.major = element_blank(),
        panel.grid.minor = element_blank(),
        panel.border = element_rect(colour = "black"),
        panel.background = element_blank())

#calculate median relative abundance

meds=round(apply(rel.otu[,1:253],2,median),2)
meds=medt[meds >=.01]
median.wilx=rel.otu[,names(medt)]

#use those bacteria with at least 1% relative abundance to calculate
#correlation between digested sample RA and MH
nondigest.otu=median.wilx[nondigest_rows,]
digest.otu=median.wilx[digest_rows,]

#Create a long dataset for grouping and graphing MH against relative abundance
bps1=cbind(nondigest.otu,factor(mh),area[nondigest_rows])
colnames(bps1)=c(colnames(nondigest.otu), "MH", "area")
nondigest.cor.plot.dat=melt(bps1)
nondigest.cor.plot.dat$MH=as.numeric(as.character(nondigest.cor.plot.dat$MH))

#Figure S3B
C<-ggplot(data=nondigest.cor.plot.dat)+
  geom_point(aes(y=value+.001,x=MH,col=area))+
  xlab("MH per pair")+
  ylab("log RA for taxa")+
  scale_y_log10()+
  guides(col=guide_legend(title="Group"))+
  facet_wrap(~variable,ncol=5)+
  theme(text = element_text(size=20))

#Calculate correlations between Mh and RA for specific taxa

correlations=apply(digest.otu[,1:(dim(bps1)[2]-3)],
                  2,
                  FUN=cor.test,
                  y=as.numeric(as.character(bps1$MH)),
                  method="spearman")

```

```

#grab only non digested samples
j=seq(1,162,2)
non.digest.otu=median.wilx[j,]

#Gram positive bacteria nondigest
pos.rows=c(grep("Bacteria/Firmicutes",colnames(non.digest.otu)),
           grep("Bacteria/Actinobacteria",colnames(non.digest.otu)))
pos.rows=pos.rows[-2]
gram.hold=non.digest.otu[,pos.rows]
neg.rows=c(2,3,4,8,9,11)
gram.neg.hold=non.digest.otu[,neg.rows]
gram.positive.nonRA=apply(gram.hold,1,sum)
gram.negative.nonRA=apply(gram.neg.hold,1,sum)
gram.non=as.data.frame(cbind(gram.positive.nonRA,gram.negative.nonRA))

#Gram positive bacteria digest
pos.rows=c(grep("Bacteria/Firmicutes",colnames(digest.otu)),
           grep("Bacteria/Actinobacteria",colnames(digest.otu)))
pos.rows=pos.rows[-2]
gram.hold=digest.otu[,pos.rows]
neg.rows=c(2,3,4,8,9,11)
gram.neg.hold=digest.otu[,neg.rows]
gram.positive.RA=apply(gram.hold,1,sum)
gram.negative.RA=apply(gram.neg.hold,1,sum)
gram.dig=as.data.frame(cbind(gram.positive.RA,gram.negative.RA))

#Create a long dataset for grouping and graphing MH against relative abundance
bps1=cbind(gram.non[1],factor(mh),area[j])
colnames(bps1)=c("Gram Positive","MH","area")
gram.non.plot.dat=melt(bps1)
gram.non.plot.dat$MH=as.numeric(as.character(gram.non.plot.dat$MH))

#Scatter plots Mh versus RA; Figure 3A
g1<-ggplot(data=gram.non.plot.dat)+
  geom_point(aes(y=gram.non.plot.dat$value,x=gram.non.plot.dat$MH,
               col=gram.non.plot.dat$area,
               size=.3))+
  xlab("MH per pair")+
  ylab("RA")+
  guides(col=F,size=F)+
  theme(text = element_text(size=30))

#calculate differences in relative abundance
diff.gram.pos=gram.positive.RA-gram.positive.nonRA
diff.gram.neg=gram.negative.RA-gram.negative.nonRA

#Create a long dataset for grouping and graphing MH against relative abundance gram positive
diff.gram=cbind.data.frame(diff.gram.pos,mh,area[j])
colnames(diff.gram)=c("Gram Positive","MH","area")
pos.plot.dat.diff=melt(diff.gram, id.vars=c("MH","area"))
pos.plot.dat.diff$MH=as.numeric(as.character(pos.plot.dat.diff$MH))

#Figure 3B
g2<-ggplot(data=pos.plot.dat.diff)+
  geom_point(aes(y=pos.plot.dat.diff$value,x=pos.plot.dat.diff$MH,
               col=pos.plot.dat.diff$area,
               size=.3))+
  xlab("MH per pair")+
  ylab("Difference (Enzd-NonEnzd) RA")+
  guides(col=F,size=F)+
  theme(text = element_text(size=30))

#Figure 3
grid.arrange(g1,g2, ncol=2, nrow=1,heights=c( 2))

##### Phyla #####

#Create a dataset that is grouped by phyla
#Relative abundance Dataset
mytok=NULL
for(i in 1:253){mytok[i] <- paste(strsplit(colnames(rel.otu)[i],"/")[[1]][1:2],collapse="/")}

phyla.otu=rel.otu[1:253]
colnames(phyla.otu)=mytok

phyla=as.data.frame(do.call(cbind,by(t(phyla.otu),INDICES=colnames(phyla.otu),FUN=colSums)))

#Create a dataset that is grouped by phyla
#OTU Dataset
mytok=NULL
for(i in 3:255){mytok[i] <- paste(strsplit(colnames(otu)[i],"/")[[1]][1:2],collapse="/")}

mytok=na.omit(mytok)
phyla.otu=otu[,3:255]
colnames(phyla.otu)=mytok

otu.phyla=as.data.frame(do.call(cbind,by(t(phyla.otu),INDICES=colnames(phyla.otu),FUN=colSums)))

#Create a dataset that is grouped by phyla
#Dataset for use in wilcoxon exact test; excludes unclassified and Bacteria
mytok=NULL
for(i in 1:251){mytok[i] <- paste(strsplit(colnames(wilx.rel.otu)[i],"/")[[1]][1:2],collapse="/")}

mytok=na.omit(mytok)
wilx.phyla.otu=wilx.rel.otu[,1:251]

```

```

colnames(wilx.phyla.otu)=mytok

wilx.phyla=as.data.frame(do.call(cbind,by(t(wilx.phyla.otu),INDICES=colnames(wilx.phyla.otu),FUN=colSums)))

##### Phyla Specific Comparisons #####

#Wilcox Rank Sum Test and Boxplots--OP Only; phyla
wilx.rel.otu.OP.phyla=wilx.phyla[1:84,]

#take only those taxa whose median relative abundance are at least 1%

med=apply(wilx.rel.otu.OP.phyla[,1:17],2,median)
meds=med[med >=.01]
median.wilx.OP=wilx.rel.otu.OP.phyla[,names(meds)]

#Calculate absolute RA for OP swabs phyla
phyla.absolute.RA.OP.digest=list()
phyla.absolute.RA.OP.non=list()
for(i in 1:5){
  phyla.absolute.RA.OP.digest[i]=tapply(median.wilx.OP[,i],digest[1:84],median)[2]*100
  phyla.absolute.RA.OP.non[i]=tapply(median.wilx.OP[,i],digest[1:84],median)[1]*100
}

#Calculate Wilcoxon Exact Signed Rank Tests for Each phyla
wilx=apply(t(median.wilx.OP),1,function(x) wilcox.exact(x[digest_rows],x[nondigest_rows],
  paired=T,conf.int = T))

#round p-values to 2 digits
wilx.estimate=round(unlist(lapply(wilx, function(x) {return(x$estimate)})),4)*100
table.p=round(p.adjust(unlist(lapply(wilx, function(x) {return(x$p.value)})),method="BH"),2)
table.p=ifelse(table.p<=0.00,0.01,table.p)
table.p=ifelse(table.p==0.01,paste("<",table.p,sep=""),table.p)

#Table One
table.ra.OP.phyla=cbind.data.frame(name.split(names(wilx)),
  unlist(phyla.absolute.RA.OP.digest),
  unlist(phyla.absolute.RA.OP.non),
  wilx.estimate,table.p)

#Name Table 1
colnames(table.ra.OP.phyla)=c("Phyla",
  "EnzD %",
  "Non-EnzD %",
  "Estimated Change in RA %",
  "P-Value")
row.names(table.ra.OP.phyla)<-seq(nrow(table.ra.OP.phyla))

#Print Table 1
xtable(table.ra.OP.phyla)

#wilcox Exact test for phyla in OP samples
wilx=apply(t(median.wilx.OP),1,function(x) wilcox.exact(x[digest_rows],x[nondigest_rows],paired=T,conf.int=T))
raw.p=round(unlist(lapply(wilx, function(x) if(x$p.value < .05){return(x$p.value)})),2)
estiamtes=round(unlist(lapply(wilx, function(x) {return(x$estimate)})),4)
phyla.wilx.OP=ifelse(raw.p<=0.00,0.01,raw.p)

#Wilcox Rank Sum Test and Boxplots--Sputum Only; phyla
wilx.rel.otu.Sputum.phyla=wilx.phyla[85:162,]

#take only those taxa whose median relative abundance are at least 1%
med=apply(wilx.rel.otu.Sputum.phyla[,1:16],2,median)
meds=med[med >=.01]
median.wilx.sputum=wilx.rel.otu.Sputum.phyla[,names(meds)]

#Calculate absolute RA for sputum swabs phyla
phyla.absolute.RA.sputum.digest=list()
phyla.absolute.RA.sputum.non=list()

for(i in 1:4){
  phyla.absolute.RA.sputum.digest[i]=tapply(median.wilx.sputum[,i],digest[85:162],median)[2]
  phyla.absolute.RA.sputum.non[i]=tapply(median.wilx.sputum[,i],digest[85:162],median)[1]
}

phyla.table.ra.sputum=cbind(phyla.absolute.RA.sputum.non,
  phyla.absolute.RA.sputum.digest)

colnames(phyla.table.ra.sputum)=c("Non-EnzD",
  "EnzD")

#Calculate Wilcoxon Exact Signed Rank Tests for Each phyla
wilx=apply(t(median.wilx.sputum),1,
  function(x) wilcox.exact(x[digest_rows],
  x[nondigest_rows],
  paired=T,conf.int = T))

#round p-values to 2 digits
wilx.estimate=round(unlist(lapply(wilx, function(x) {return(x$estimate)})),4)*100
table.p=round(p.adjust(unlist(lapply(wilx, function(x) {return(x$p.value)})),method="BH"),2)
table.p=ifelse(table.p<=0.00,0.01,table.p)
table.p=ifelse(table.p==0.01,paste("<",table.p,sep=""),table.p)

#Table One
table.ra.sputum.phyla=cbind.data.frame(name.split(names(wilx)),
  unlist(phyla.absolute.RA.sputum.digest),
  unlist(phyla.absolute.RA.sputum.non),
  wilx.estimate,table.p)

#Name Table 1
colnames(table.ra.sputum.phyla)=c("Phyla",
  "EnzD %",
  "Non-EnzD %",
  "Estimated Change in RA %",
  "P-Value")
row.names(table.ra.sputum.phyla)<-seq(nrow(table.ra.sputum.phyla))

```

```

#Print Table 1
xtable(table.ra.sputum.phyla)

##wilcox Exact test for phyla in sputum samples
wilx=apply(t(median.wilx.sputum),1,function(x) wilcox.exact(x[digest_rows],x[nondigest_rows],paired=T,conf.int=T))
phyla.sputum.estimates=raw.p=round(unlist(lapply(wilx, function(x) {return(x$estimate)})),2)
raw.p=round(unlist(lapply(wilx, function(x) if(x$p.value < .05){return(x$p.value)})),2)
phyla.wilx.sputum=ifelse(raw.p<=0.00,0.01,raw.p)

significant.bacteria.phyla=as.character(names(phyla.wilx.OP))
significant.bacteria.phyla=as.character(significant.bacteria.phyla)
pvalues.bps=phyla.wilx.OP

#calculate Staph p-values as before
sputum.vals=wilx.rel.otu.Sputum.phyla[,significant.bacteria.phyla]

i=0
hold=NULL
pvalues.sputum.bps=NULL

for(i in 1:length(significant.bacteria.phyla)){
  hold=wilcox.exact(sputum.vals[,i]~digest[85:162],paired=T)
  pvalues.sputum.bps[i]=hold$p.value
}

round.ps=round(pvalues.sputum.bps,2)
pvals=ifelse(round.ps==0,.01,round.ps)
pvall=ifelse(pvals==.01,paste("p<",pvals, sep=""),paste("p=",pvals, sep=""))

#Create a new dataset with the relative abundance of all significant taxa based on Wilcoxon Signed Rank Tests
bps=wilx.phyla.otu[,significant.bacteria.phyla]

#format names and p-values
name.list1=name.split(significant.bacteria.phyla)
name.pvall=ifelse(pvalues.bps==.01,paste("p<",pvalues.bps, sep=""),paste("p=",pvalues.bps, sep=""))

#Create data frames for digested versus non digested
bps=cbind(bps,area,digest)
colnames(bps)=c(name.list1,"area","digest")
bps.digest=bps[bps$digest=="With EnzD",]
bps.non=bps[bps$digest=="Without EnzD",]

#Calculate difference in RA between digested and non digested
diff.bps=bps.digest[,1:5]-bps.non[,1:5]
diff.area=factor(c(rep("OP",42),rep("Sputum",39)))
diff.bps=cbind(diff.bps,diff.area)

#Create a long format dataset to in order to use facet_wrap in ggplot; area and digest remain as Id variables
plot.dat1=melt(diff.bps,idvars=diff.area)

#Figure 3A
A<-ggplot(data=plot.dat1)+
  geom_boxplot(aes(y = value,x=factor(diff.area)))+
  coord_cartesian(ylim=c(-.30,.55))+
  xlab("")+
  ylab("Phyla")+
  labs(fill="Group")+
  annotate("text", x = 1, y = .55, label = name.pvall,size = 5) +
  annotate("text", x = 2, y = .55, label = pvall,size = 5)+
  facet_wrap(~variable, nrow = 4, ncol = 5)+
  theme(text = element_text(size=25))

#figure 3
grid.arrange(A, B, ncol=1, nrow=2,heights=c(.8, 2))

#stacked bar chart for significant phyla in OP samples
names=names(phyla.wilx.OP)

med=apply(wilx.phyla[,1:17],2,median)
meds=med[med >=.01]
median.wilx=wilx.phyla[,names(meds)]

##### MH Correlations in Phyla #####

#grab only non digested samples
j=seq(1,162,2)
non.digest.otu=median.wilx[j,]

#Create a long dataset for grouping and graphing MH against relative abundance
bps1=cbind(non.digest.otu,factor(mh),area[j])
colnames(bps1)=c(colnames(non.digest.otu),"MH","area")
phyla.cor.plot.dat=melt(bps1)
phyla.cor.plot.dat$MH=as.numeric(as.character(phyla.cor.plot.dat$MH))

#Calculate correlations between Mh and RA for specific taxa
bps1$MH=as.numeric(as.character(bps1$MH))

c=list()
name=NULL
i=0

for(i in 1:(dim(bps1)[2]-3)){
  if(cor.test(non.digest.otu[,i],bps1$MH,method="spearman")$p.value<= 0.05){
    c[[i]]=cor.test(non.digest.otu[,i],bps1$MH,method="spearman")
    name[i]=colnames(non.digest.otu)[i]
  }
}

```



```

#Figure S3A
D<-ggplot(data=phyla.cor.plot.dat)+
  geom_point(aes(y=value+.001,x=MH,col=area))+
  xlab("MH per pair")+
  ylab("log RA for taxa")+
  scale_y_log10()+
  guides(col=guide_legend(title="Group"))+
  facet_wrap(~variable,ncol=5)+
  theme(text = element_text(size=20))

#Figure S3
grid.arrange(D, C, ncol=1, nrow=2,heights=c(.8, 2))

##### Alpha Diversity Plot: Supplement #####

#Create Dataframes for digested versus non digested
rel.otu=cbind.data.frame(rel.otu,digest)
digest.otu=rel.otu[rel.otu$digest=="With EnzD",]
non.digest.otu=rel.otu[rel.otu$digest=="Without EnzD",]

#Create distance matrices from digested and non digested dataframes
digest.Odiv=diversity(digest.otu[,1:253],index="shannon")
non.Odiv=diversity(non.digest.otu[,1:253],index="shannon")
Ddiv=digest.Odiv-non.Odiv

#area variables
diff.area=factor(c(rep(1,42),rep(2,39)),levels=c(1,2),labels=c("OP","Sputum"))

#long format data frame
diversity.plot.dat=cbind.data.frame(Ddiv,mh,diff.area)

#plot Figure S2
ggplot(diversity.plot.dat)+
  geom_point(aes(x=mh,y=Ddiv,
                col=factor(diff.area),
                size=.3))+
  guides(col=guide_legend(title="Sample Type",
                          override.aes=list(size=5)),
         size=F)+
  xlab("Morisita Horn")+
  ylab("Difference in Alpha Diversity (EnzD-nonEnzD)")+
  theme(text = element_text(size=33))

##### Table 3 #####

library("xtable")

#Load in excel file of CF pathogens from Explicet
pathogens=read.csv("C:/Users/Connie/Desktop/CF_pathogens.csv",header=T)

#Format the raw file
pathogens=cbind.data.frame(apply(pathogens,2,function(x){gsub("%"," ",x)}))
pathogens=otu_from_explicet(pathogens)

#Create pseudomonas plus
pathogens$pseudomonasplus=pathogens$`Bacteria/Proteobacteria/Gammaproteobacteria/Pseudomonadales`+
  pathogens$`Bacteria/Proteobacteria/Gammaproteobacteria/Pseudomonadales/Pseudomonadaceae/Pseudomonas`

#Subset into digested and non-digested samples
digest=pathogens[grepl("B",pathogens$Id),]
non_digest=pathogens[!(pathogens$Id%in%digest$Id),]

#Calculate the difference in RA between digested and non-digested samples
difference_data=cbind.data.frame(non_digest$Id,digest[,2:8]-non_digest[,2:8])
colnames(difference_data)=c("Id",colnames(digest)[2:8])

#separate the differences by sample type
op=difference_data[grepl("C",difference_data$Id),]
sputum=difference_data[grepl("E",difference_data$Id),]

#Extract any differences greater than 1%
op_Haem_increase=op[op$`Bacteria/Proteobacteria/Gammaproteobacteria/Pasteurellales/Pasteurellaceae/Haemophilus`>1,4]
op_Haem_decrease=op[op$`Bacteria/Proteobacteria/Gammaproteobacteria/Pasteurellales/Pasteurellaceae/Haemophilus`<-1,4]

op_staph_increase=op[op$`Bacteria/Firmicutes/Bacilli/Bacillales/Staphylococcaceae/Staphylococcus`>1,2]
op_staph_decrease=op[op$`Bacteria/Firmicutes/Bacilli/Bacillales/Staphylococcaceae/Staphylococcus`<-1,2]

op_Achrom_increase=op[op$`Bacteria/Proteobacteria/Betaproteobacteria/Burkholderiales/Alcaligenaceae/Achromobacter`>1,3]
op_Achrom_decrease=op[op$`Bacteria/Proteobacteria/Betaproteobacteria/Burkholderiales/Alcaligenaceae/Achromobacter`<-1,3]

op_steno_increase=op[op$`Bacteria/Proteobacteria/Gammaproteobacteria/Xanthomonadales/Xanthomonadaceae/Stenotrophomonas`>1,7]
op_steno_decrease=op[op$`Bacteria/Proteobacteria/Gammaproteobacteria/Xanthomonadales/Xanthomonadaceae/Stenotrophomonas`<-1,7]

op_pseud_increase=op[op$pseudomonasplus>1,8]
op_pseud_decrease=op[op$pseudomonasplus<-1,8]

sputum_Haem_increase=sputum[sputum$`Bacteria/Proteobacteria/Gammaproteobacteria/Pasteurellales/Pasteurellaceae/Haemophilus`>1,4]
sputum_Haem_decrease=sputum[sputum$`Bacteria/Proteobacteria/Gammaproteobacteria/Pasteurellales/Pasteurellaceae/Haemophilus`<-1,4]

sputum_staph_increase=sputum[sputum$`Bacteria/Firmicutes/Bacilli/Bacillales/Staphylococcaceae/Staphylococcus`>1,2]
sputum_staph_decrease=sputum[sputum$`Bacteria/Firmicutes/Bacilli/Bacillales/Staphylococcaceae/Staphylococcus`<-1,2]

sputum_Achrom_increase=sputum[sputum$`Bacteria/Proteobacteria/Betaproteobacteria/Burkholderiales/Alcaligenaceae/Achromobacter`>1,3]
sputum_Achrom_decrease=sputum[sputum$`Bacteria/Proteobacteria/Betaproteobacteria/Burkholderiales/Alcaligenaceae/Achromobacter`<-1,3]

sputum_steno_increase=sputum[sputum$`Bacteria/Proteobacteria/Gammaproteobacteria/Xanthomonadales/Xanthomonadaceae/Stenotrophomonas`>1,7]
sputum_steno_decrease=sputum[sputum$`Bacteria/Proteobacteria/Gammaproteobacteria/Xanthomonadales/Xanthomonadaceae/Stenotrophomonas`<-1,7]

sputum_pseud_increase=sputum[sputum$pseudomonasplus>1,8]
sputum_pseud_decrease=sputum[sputum$pseudomonasplus<-1,8]

```

```
#Create a list
```

```
bacteria_increase=list(op_Haem_increase,op_staph_increase,op_Achrom_increase,op_steno_increase,op_pseud_increase,  
  sputum_Haem_increase,sputum_staph_increase,sputum_Achrom_increase,sputum_steno_increase,sputum_pseud_increase)
```

```
bacteria_decrease=list(op_Haem_decrease,op_staph_decrease,op_Achrom_decrease,op_steno_decrease,op_pseud_decrease,  
  sputum_Haem_decrease,sputum_staph_decrease,sputum_Achrom_decrease,sputum_steno_decrease,sputum_pseud_decrease)
```

```
#Find summary statistics
```

```
IQR_increase=do.call(rbind, lapply(bacteria_increase,summary))
```

```
IQR_decrease=do.call(rbind, lapply(bacteria_decrease,summary))
```
